# Supplementary material for: Comprehensive short and long read sequencing analysis for the Gaucher and Parkinson’s disease-associated GBA gene
Source: PubMed Central journal article supplement (PMC9259685; doi:10.1038/s42003-022-03610-7), 2022-07-06
Supplement: 42003_2022_3610_MOESM2_ESM.pdf [file 42003_2022_3610_MOESM2_ESM.pdf]

# Supplementary figures

**Supplementary Figure 1:** Confirmation of the structure of 4 reciprocal recombinant alleles with ONT.

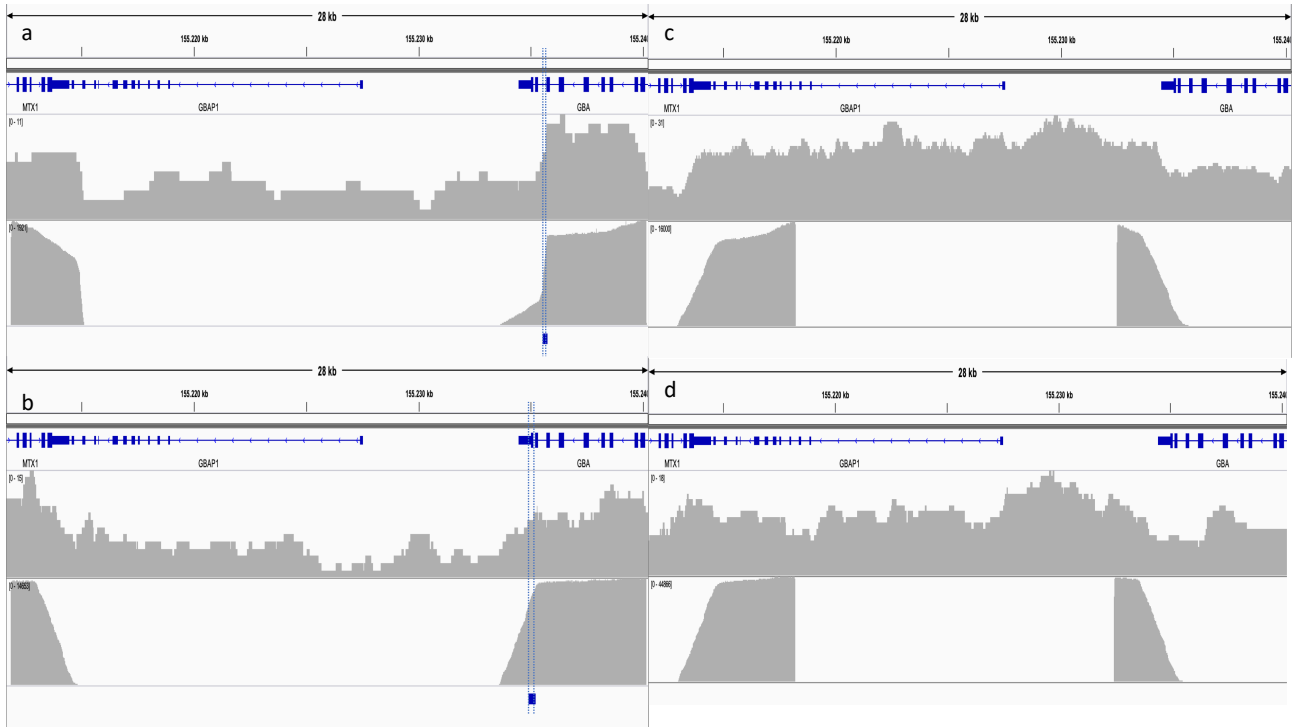

Each panel shows results of one sample: genomic sequencing with adaptive sampling (top), and sequencing of PCR product obtained with primers 2 or 3 (bottom). **a)** Pathogenic CNL allele. **b)** non-pathogenic CNL allele. **c)** CNG allele with a copy number of 5 copies as called by Gauchian 5. **d)** CNG allele with a copy number of 3 copies as predicted by Gauchian.

For the fusion recombinants (A and B), the blue squares and dotted lines at the bottom show the position of the breakpoint predicted with ONT (as described in methods). The breakpoint cannot be refined further as the sequences are identical; see also figure S2. Alignment with LAST.

Genomic region depicted: g.chr1:155,211,770-155,240,380

## Supplementary Figure 2: Detection of SNVs in homopolymers with ONT.

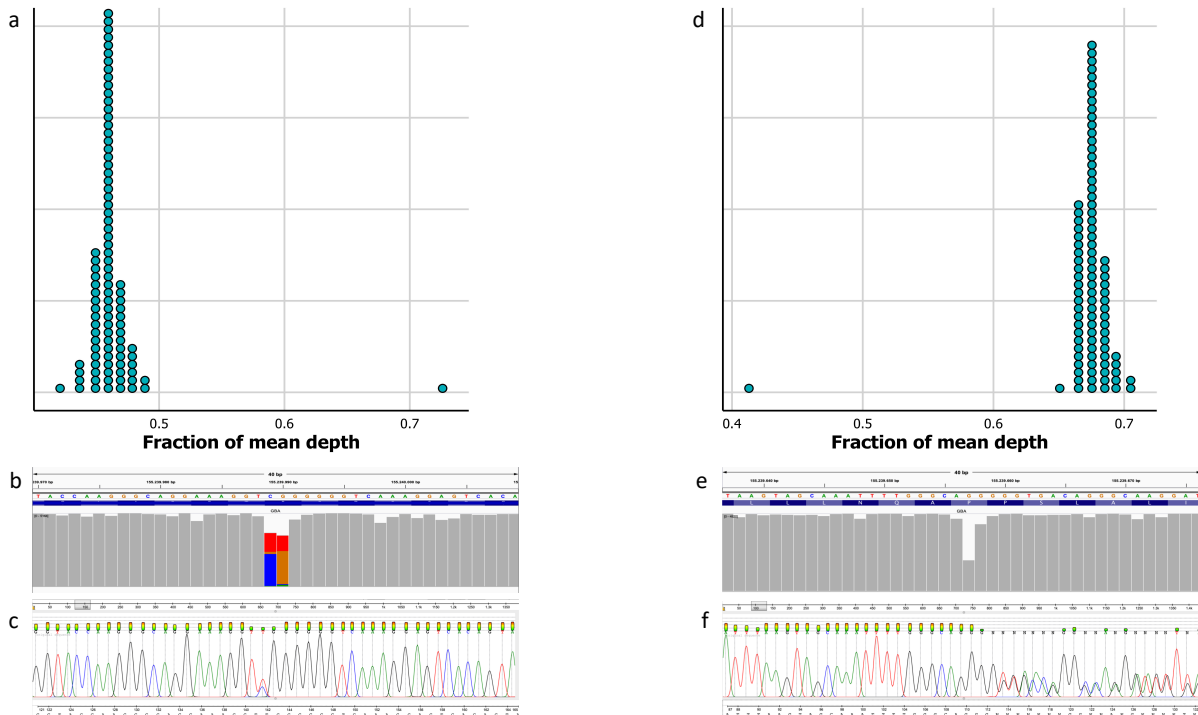

At position chr1:155,239,990 one sample shows an adjusted depth of coverage that is more than 5 median absolute deviations (MAD) higher than the mean of the other samples **(a)**. Inspection of the sequencing data obtained from ONT (primer pair 1) shows that this is probably due to the presence of a single base substitution at position chr1:155,239,989 **(b)**, as confirmed by sanger sequencing **(c)**. Similarly, at position chr1:155,239,657, one sample shows an adjusted depth of coverage that is more than 5 MAD lower than the mean of the other samples, suggesting the deletion of a G in the poly-G. This corresponds to the variant NM\_001005742.3:c.413delC **(d)**. Inspection of the sequencing data obtained from ONT (primer pair 1) confirms the drop in depth of coverage **(e)** and Sanger sequencing confirms the presence of a deletion in the poly-G sequence **(f)**.

**Supplementary Figure 3:** Visual display of two reciprocal fusion recombinant alleles.

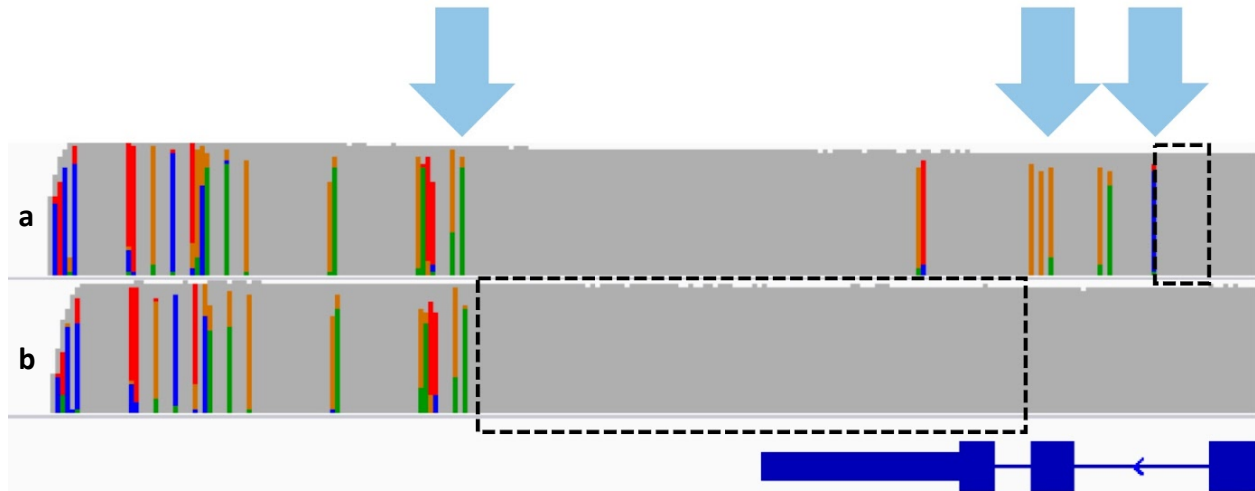

The light blue arrows represent the sentinel positions where *GBA* and *GBAPI* are not homologous. The dotted boxes represent the predicted position of the breakpoints. **a)** breakpoint is between exon 9 and intron 9, so this recombinant allele is predicted to be pathogenic. This is a case of GD, where a pathogenic allele is expected, and indeed had been previously reported independently. **b)** Breakpoint does not affect coding sequence. Exon 11 of *GBA* is 100% homologous to *GBAPI*, so recombinations involving this area do not alter the ORF, so this recombinant is non-pathogenic.

**Supplementary Figure 4:** IGV screenshot showing the p.L483R variant.

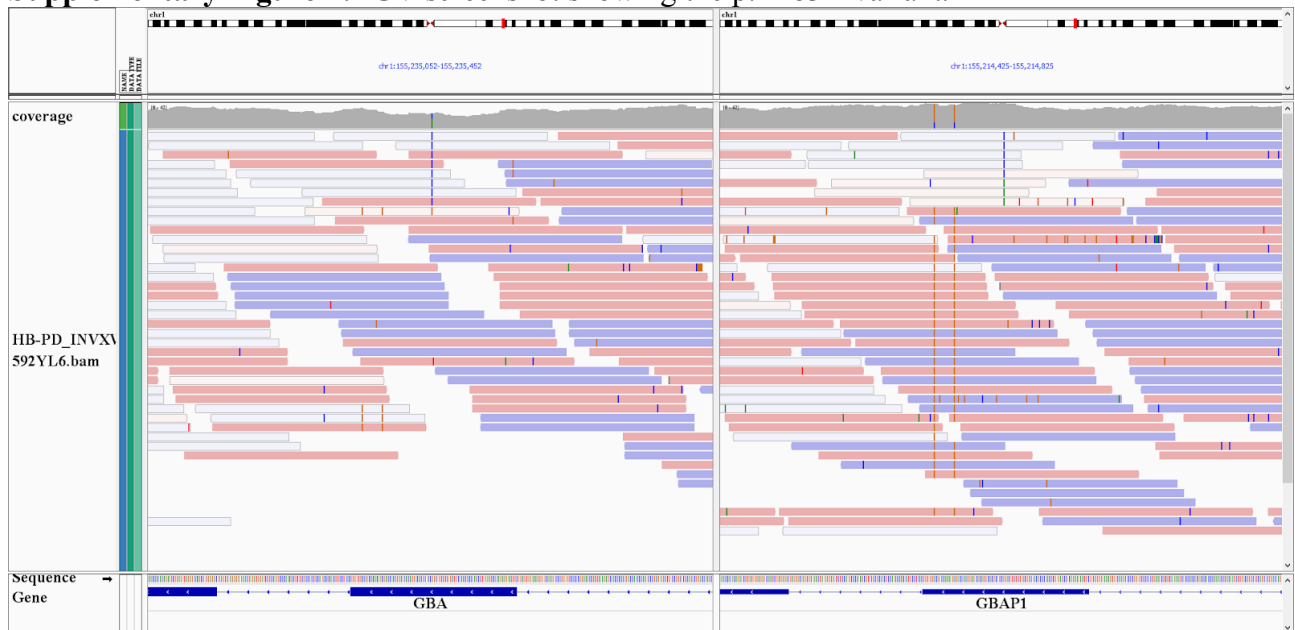

Reads carrying the C variant in the middle are aligned to either *GBA* or *GBAPI*. Many of them have a mapping quality of zero. Hence the variant is missed by BWA-GATK. Genomic region depicted: g.chr1:155,235,052-155,235,452 (left) and g.chr1:155,214,425-155,214,825 (right)

## Supplementary tables

**Supplementary Table 1:** Results of dPCR. The mean dPCR copy number of 2 probes is given.

| Sample  | Copy number detected by<br>Gaussian | Copy number<br>(dPCR) | ONT CNV<br>detected |
|---------|-------------------------------------|-----------------------|---------------------|
| NA20756 | 3                                   | 3.18                  | Duplication         |
| HG01912 | 5                                   | 5.15                  | Duplication         |
| HG01889 | 7                                   | 6.71                  | Duplication         |
| HG02284 | 8                                   | 7.86                  | Duplication         |
| RAP1    | not analysed                        | 0.98                  | Fusion              |
| RAP2    | not analysed                        | 2.06                  | None                |

**Supplementary Table 2:** Phenotypes and genotypes of all samples from the RAPSODI cohort.

|                     | Wild type | Heterozygous<br>carriers* | Homozygous and<br>compound<br>heterozygous carriers* | Total |
|---------------------|-----------|---------------------------|------------------------------------------------------|-------|
| PD Patients         | 195       | 36                        | 0                                                    | 231   |
| GD Patients         | 0         | 0                         | 33                                                   | 33    |
| Healthy individuals | 74        | 43                        | 0                                                    | 117   |
| <b>total</b>        | 269       | 79                        | 33                                                   | 381   |

\*Including pathogenic structural variants.

**Supplementary Table 3:** All variants detected in the RAPSODI and QSBB cohorts.

| Allele detected                                                              | Number of alleles |
|------------------------------------------------------------------------------|-------------------|
| p.N409S (NC_000001.11:g.155235843T>G)                                        | 35                |
| p.L483P (NC_000001.11:g.155235252A>G)                                        | 19                |
| p.E365K (NC_000001.11:g.155236376C>T)                                        | 15                |
| p.T408M (NC_000001.11:g.155236246G>A)                                        | 4                 |
| p.R502C (NC_000001.11:g.155235196G>A)                                        | 3                 |
| IVS6-2 (NC_000001.11:155238308T>C)                                           | 2                 |
| p.R301H (NC_000001.11:g.155237438C>T)                                        | 2                 |
| p.84GG (NC_000001.11:g.155240661dup)                                         | 1                 |
| p.D419N (NC_000001.11:g.155235814C>T)                                        | 1                 |
| IVS9+1 (NC_000001.11:g.155235680C>T)                                         | 1                 |
| p.K13R (NC_000001.11:g.155240707T>C)                                         | 1                 |
| p.R301G (NC_000001.11:g.155237439G>C)                                        | 1                 |
| p.T270I (NC_000001.11:g.155237531G>C)                                        | 1                 |
| p.T408M + L104= (NC_000001.11:g.155236246G>A + 155239758C>T)                 | 1                 |
| p.A357D (NC_000001.11:g.155236399G>T)                                        | 1                 |
| p.D354H (NC_000001.11:g.155236409C>G)                                        | 1                 |
| p.G241R (NC_000001.11:g.155238174C>T)                                        | 1                 |
| p.L519P (NC_000001.11:g.155235050A>G)                                        | 1                 |
| p.P211T (NC_000001.11:g.155238234G>T)                                        | 1                 |
| c.413delC (NC_000001.11:g.155239661del)                                      | 1                 |
|                                                                              |                   |
| RecNciI(p.A495P + p.Val499= + p.L483P) / reciprocal                          | 5                 |
| RecNciI(p.A495P + p.Val499= + p.L483P) / non-reciprocal                      | 1                 |
| RecTL (p.A495P + p.Val499= + p.L483P + p.D448H) + c.1263del / non-reciprocal | 2                 |
|                                                                              |                   |
| Non-pathogenic reciprocal CN loss recombinants                               | 4*                |
| Non-pathogenic reciprocal CN gain recombinants                               | 7**               |

These do not include the variants found in the 95 samples previously reported (Salazar et al, 2019)

\*In two alleles, a non-pathogenic CNL was detected in cis with p.L444P

\*\*In two samples, a CNG was detected together with c.1263del+RecTL (gene conversion). In two other samples, a duplication recombinant was detected together with the p.L483P variant. These were not phased.

**Supplementary Table 4:** List of *GBA1*-like variant calls in Exon 9-11 homology region in 1kGP and AMP-PD cohorts.

| sampleID | IsBiallelic | IsCarrier | CN(GBA+GBA1) | Deletion breakpoint in <i>GBA</i> | Recombinant variant allele1 | Recombinant variant allele2 |
|----------|-------------|-----------|--------------|-----------------------------------|-----------------------------|-----------------------------|
| HG00422  | FALSE       | TRUE      | 3            | TRUE                              | RecNciI                     |                             |
| LB-00540 | FALSE       | TRUE      | 3            | TRUE                              | RecNciI                     |                             |
| LB-00542 | FALSE       | TRUE      | 3            | TRUE                              | RecNciI                     |                             |
| LB-00599 | FALSE       | TRUE      | 3            | TRUE                              | RecNciI                     |                             |
| LB-00695 | FALSE       | TRUE      | 3            | TRUE                              | RecNciI                     |                             |
| LB-01632 | FALSE       | TRUE      | 3            | TRUE                              | c.1263del+RecTL             |                             |
| LB-01652 | FALSE       | TRUE      | 3            | FALSE                             | L483P                       |                             |
| LB-01755 | FALSE       | TRUE      | 3            | TRUE                              | RecNciI                     |                             |
| LB-01782 | FALSE       | TRUE      | 3            | TRUE                              | RecNciI                     |                             |
| LB-01788 | FALSE       | TRUE      | 3            | TRUE                              | RecNciI                     |                             |
| LB-02286 | FALSE       | TRUE      | 3            | TRUE                              | RecNciI                     |                             |
| LB-02338 | FALSE       | TRUE      | 3            | TRUE                              | RecNciI                     |                             |

|                           |       |      |   |       |                 |  |
|---------------------------|-------|------|---|-------|-----------------|--|
| <b>LB-02662</b>           | FALSE | TRUE | 3 | TRUE  | c.1263del+RecTL |  |
| <b>LB-02817</b>           | FALSE | TRUE | 3 | TRUE  | RecNciI         |  |
| <b>HB-PD_INVDX373 MWV</b> | FALSE | TRUE | 3 | FALSE | L483P           |  |
| <b>HB-PD_INVWN63 5UXR</b> | FALSE | TRUE | 3 | TRUE  | RecNciI         |  |
| <b>PD-PDEK306DBC</b>      | FALSE | TRUE | 3 | FALSE | L483P           |  |
| <b>PD-PDLR687WTH</b>      | FALSE | TRUE | 3 | TRUE  | c.1263del+RecTL |  |
| <b>HG00119</b>            | FALSE | TRUE | 4 | None  | c.1263del+RecTL |  |
| <b>NA20815</b>            | FALSE | TRUE | 4 | None  | L483P           |  |
| <b>NA18991</b>            | FALSE | TRUE | 4 | None  | L483P           |  |
| <b>HG02613</b>            | FALSE | TRUE | 4 | None  | A495P           |  |
| <b>HG00115</b>            | FALSE | TRUE | 4 | None  | c.1263del+RecTL |  |
| <b>HG02439</b>            | FALSE | TRUE | 4 | None  | c.1263del       |  |
| <b>NA20513</b>            | FALSE | TRUE | 4 | None  | L483P           |  |
| <b>HG00310</b>            | FALSE | TRUE | 4 | None  | L483P           |  |
| <b>HG02151</b>            | FALSE | TRUE | 4 | None  | c.1263del       |  |
| <b>HG03967</b>            | FALSE | TRUE | 4 | None  | L483P           |  |
| <b>LB-00009</b>           | FALSE | TRUE | 4 | None  | RecNciI         |  |
| <b>LB-00092</b>           | FALSE | TRUE | 4 | None  | L483P           |  |
| <b>LB-00483</b>           | FALSE | TRUE | 4 | None  | RecNciI         |  |
| <b>LB-00490</b>           | FALSE | TRUE | 4 | None  | L483P           |  |
| <b>LB-00575</b>           | FALSE | TRUE | 4 | None  | c.1263del       |  |
| <b>LB-00668</b>           | FALSE | TRUE | 4 | None  | L483P           |  |
| <b>LB-00734</b>           | FALSE | TRUE | 4 | None  | L483P           |  |
| <b>LB-00760</b>           | FALSE | TRUE | 4 | None  | L483P           |  |
| <b>LB-00906</b>           | FALSE | TRUE | 4 | None  | A495P           |  |
| <b>LB-01188</b>           | FALSE | TRUE | 4 | None  | L483P           |  |
| <b>LB-01223</b>           | FALSE | TRUE | 4 | None  | c.1263del       |  |
| <b>LB-01297</b>           | FALSE | TRUE | 4 | None  | L483P           |  |
| <b>LB-01339</b>           | FALSE | TRUE | 4 | None  | A495P           |  |
| <b>LB-01351</b>           | FALSE | TRUE | 4 | None  | L483P           |  |
| <b>LB-01363</b>           | FALSE | TRUE | 4 | None  | L483P           |  |
| <b>LB-01388</b>           | FALSE | TRUE | 4 | None  | L483P           |  |
| <b>LB-01391</b>           | FALSE | TRUE | 4 | None  | L483P           |  |
| <b>LB-01403</b>           | FALSE | TRUE | 4 | None  | L483P           |  |
| <b>LB-01440</b>           | FALSE | TRUE | 4 | None  | A495P           |  |
| <b>LB-01477</b>           | FALSE | TRUE | 4 | None  | c.1263del       |  |
| <b>LB-01540</b>           | FALSE | TRUE | 4 | None  | D448H           |  |
| <b>LB-01599</b>           | FALSE | TRUE | 4 | None  | L483P           |  |
| <b>LB-01613</b>           | FALSE | TRUE | 4 | None  | D448H           |  |
| <b>LB-01631</b>           | FALSE | TRUE | 4 | None  | RecNciI         |  |
| <b>LB-01696</b>           | FALSE | TRUE | 4 | None  | L483P           |  |
| <b>LB-01752</b>           | FALSE | TRUE | 4 | None  | L483P           |  |

|                           |       |      |   |      |                 |  |
|---------------------------|-------|------|---|------|-----------------|--|
| <b>LB-01803</b>           | FALSE | TRUE | 4 | None | L483P           |  |
| <b>LB-01894</b>           | FALSE | TRUE | 4 | None | L483P           |  |
| <b>LB-01922</b>           | FALSE | TRUE | 4 | None | L483P           |  |
| <b>LB-02197</b>           | FALSE | TRUE | 4 | None | L483P           |  |
| <b>LB-02483</b>           | FALSE | TRUE | 4 | None | A495P           |  |
| <b>LB-02676</b>           | FALSE | TRUE | 4 | None | c.1263del       |  |
| <b>LB-02760</b>           | FALSE | TRUE | 4 | None | c.1263del       |  |
| <b>LB-02784</b>           | FALSE | TRUE | 4 | None | L483P           |  |
| <b>LB-02815</b>           | FALSE | TRUE | 4 | None | c.1263del+RecTL |  |
| <b>LB-08162</b>           | FALSE | TRUE | 4 | None | c.1263del       |  |
| <b>LB-06559</b>           | FALSE | TRUE | 4 | None | A495P           |  |
| <b>LB-07084</b>           | FALSE | TRUE | 4 | None | D448H           |  |
| <b>LB-07658</b>           | FALSE | TRUE | 4 | None | A495P           |  |
| <b>BF-1080</b>            | FALSE | TRUE | 4 | None | A495P           |  |
| <b>HB-PD_INVHN100 ZHK</b> | FALSE | TRUE | 4 | None | A495P           |  |
| <b>HB-PD_INVKJ120 VLF</b> | FALSE | TRUE | 4 | None | L483P           |  |
| <b>HB-PD_INVWU75 7PGL</b> | FALSE | TRUE | 4 | None | RecNciI         |  |
| <b>PD-PDCH154ZHF</b>      | FALSE | TRUE | 4 | None | D448H           |  |
| <b>PD-PDDJ206TP0</b>      | FALSE | TRUE | 4 | None | RecNciI         |  |
| <b>PD-PDEW749KZU</b>      | FALSE | TRUE | 4 | None | L483P           |  |
| <b>PD-PDMD724EA9</b>      | FALSE | TRUE | 4 | None | L483P           |  |
| <b>PD-PDXU108EDQ</b>      | FALSE | TRUE | 4 | None | L483P           |  |
| <b>PD-PDXU630RLV</b>      | FALSE | TRUE | 4 | None | L483P           |  |
| <b>PP-3420</b>            | FALSE | TRUE | 4 | None | L483P           |  |
| <b>PP-3429</b>            | FALSE | TRUE | 4 | None | A495P           |  |
| <b>PP-3700</b>            | FALSE | TRUE | 4 | None | L483P           |  |
| <b>PP-41342</b>           | FALSE | TRUE | 4 | None | L483P           |  |
| <b>PP-60060</b>           | FALSE | TRUE | 4 | None | L483P           |  |
| <b>HB-PD_INVAV028 JED</b> | FALSE | TRUE | 4 | None | L483P           |  |
| <b>HB-PD_INVLR599 UE9</b> | FALSE | TRUE | 4 | None | D448H           |  |
| <b>HB-PD_INVLU007 ANL</b> | FALSE | TRUE | 4 | None | L483P           |  |
| <b>PD-PDGF687UAV</b>      | FALSE | TRUE | 4 | None | L483P           |  |
| <b>PP-57787</b>           | FALSE | TRUE | 4 | None | L483P           |  |

|                                    |       |       |   |      |                 |       |
|------------------------------------|-------|-------|---|------|-----------------|-------|
| <b>PP-59343</b>                    | FALSE | TRUE  | 4 | None | L483P           |       |
| <b>PP-59926</b>                    | FALSE | TRUE  | 4 | None | L483P           |       |
| <b>LB-00239</b>                    | FALSE | TRUE  | 5 | None | L483P           |       |
| <b>BF-1016</b>                     | FALSE | TRUE  | 5 | None | L483P           |       |
| <b>HB-<br/>PD_INVRH572<br/>AT6</b> | FALSE | TRUE  | 5 | None | L483P           |       |
| <b>PP-3307</b>                     | FALSE | TRUE  | 5 | None | L483P           |       |
| <b>LB-00823</b>                    | FALSE | TRUE  | 6 | None | D448H           |       |
| <b>LB-02672</b>                    | TRUE  | FALSE | 7 | None | D448H           | L483P |
| <b>LB-01354</b>                    | FALSE | TRUE  | 8 | None | c.1263del+RecTL |       |



**Supplementary Table 5:** Complete list of the number of samples carrying *GBA* variants in population samples.

| Variant         | 1kGP   | PD          |                | LBD         |                | mild/severe              |
|-----------------|--------|-------------|----------------|-------------|----------------|--------------------------|
|                 | N=2405 | case N=2325 | control N=1255 | case N=2598 | control N=1941 |                          |
| c.115+1G>A      | 2      | 3           | 1              | 3           | 0              | severe                   |
| c.1263del       | 2      | 0           | 0              | 6           | 0              | severe                   |
| c.1263del+RecTL | 2      | 1           | 0              | 4           | 0              | severe                   |
| p.A348V         | 0      | 0           | 0              | 1           | 0              | mild                     |
| p.A495P         | 1      | 3           | 0              | 4           | 2              | mild                     |
| p.D438N         | 0      | 0           | 0              | 1           | 0              | severe                   |
| p.D448H         | 0      | 1           | 1              | 4           | 1              | severe                   |
| p.E365K         | 25     | 91          | 21             | 145         | 30             | non-pathogenic (PD risk) |
| p.F252I         | 0      | 1           | 0              | 0           | 0              | severe                   |
| p.F298L         | 0      | 0           | 0              | 1           | 0              | severe                   |
| p.G241R         | 0      | 1           | 0              | 4           | 0              | severe                   |
| p.G364R         | 0      | 0           | 0              | 1           | 0              | severe                   |
| p.G416S         | 0      | 0           | 0              | 1           | 0              | mild                     |
| p.H350R         | 0      | 0           | 0              | 1           | 0              | severe                   |
| p.K118N         | 0      | 0           | 0              | 1           | 0              | mild                     |
| p.L29fs         | 0      | 3           | 0              | 0           | 1              | severe                   |
| p.L483P         | 5      | 14          | 6              | 23          | 0              | severe                   |
| p.L483R         | 0      | 1           | 0              | 0           | 0              | severe                   |
| p.N227S         | 1      | 0           | 0              | 1           | 0              | mild                     |
| p.N409S         | 3      | 128         | 158            | 59          | 19             | mild                     |
| p.P305fs        | 0      | 0           | 0              | 1           | 0              | severe                   |
| p.R159W         | 0      | 3           | 0              | 3           | 0              | severe                   |
| p.R170C         | 0      | 0           | 0              | 1           | 0              | severe                   |
| p.R296Q         | 0      | 3           | 1              | 3           | 0              | severe                   |
| p.R398X         | 0      | 0           | 0              | 1           | 0              | severe                   |
| p.R502C         | 2      | 2           | 0              | 8           | 0              | severe                   |
| p.R535C         | 0      | 0           | 0              | 1           | 0              | mild                     |
| p.R535H         | 0      | 6           | 3              | 4           | 1              | mild                     |
| p.R87W          | 0      | 0           | 0              | 1           | 0              | mild                     |
| p.S235P         | 0      | 1           | 0              | 0           | 0              | severe                   |
| p.T408M         | 9      | 38          | 10             | 65          | 32             | non-pathogenic (PD risk) |
| p.V433L         | 0      | 1           | 0              | 1           | 0              | severe                   |
| p.V499L         | 0      | 0           | 0              | 1           | 0              | mild                     |
| p.W223R         | 0      | 0           | 0              | 1           | 0              | severe                   |
| p.W420X         | 0      | 0           | 0              | 1           | 0              | unknown                  |
| RecNciI         | 1      | 3           | 0              | 13          | 0              | severe                   |

**Supplementary Table 6: Analysis of Trios in the 1kGP cohort.**

| <b>Proband</b>                                        | <b>variant</b> | <b>father</b> | <b>variant</b> | <b>mother</b> | <b>variant</b> |
|-------------------------------------------------------|----------------|---------------|----------------|---------------|----------------|
| HG01053                                               | T408M          | HG01051       | T408M          | HG01052       | None           |
| HG01096                                               | E365K          | HG01094       | None           | HG01095       | E365K          |
| HG01258                                               | N409S          | HG01256       | None           | HG01257       | N409S          |
| HG02514                                               | c.115+1G>A     | HG02512       | c.115+1G>A     | HG02513       | None           |
| NA07348                                               | E365K          | NA07357       | None           | NA07345       | E365K          |
| HG03909                                               | T408M          | HG03908       | T408M          | HG03907       | None           |
| NA12335                                               | T408M          | NA12340       | None           | NA12341       | T408M          |
| HG02615                                               | A495P          | HG02613       | A495P          | HG02614       | None           |
| HG03669                                               | None           | HG03667       | E365K          | HG03668       | None           |
| NA10860                                               | None           | NA11992       | E365K          | NA11993       | None           |
| NA12386                                               | None           | NA12399       | E365K          | NA12400       | None           |
| NA12818                                               | None           | NA12829       | E365K          | NA12830       | None           |
| NA12877                                               | None           | NA12889       | N409S          | NA12890       | None           |
| NA10865                                               | None           | NA11891       | None           | NA11892       | c.115+1G>A     |
| NA12767                                               | None           | NA12777       | None           | NA12778       | E365K          |
| NA19151                                               | None           | NA19150       | None           | NA19149       | N227S          |
| HG00423                                               | None           | HG00421       | None           | HG00422       | RecNcil        |
| HG01062                                               | None           | HG01060       | None           | HG01061       | T408M          |
| HG01505                                               | None           | HG01503       | None           | HG01504       | T408M          |
| HG01508                                               | None           | HG01506       | None           | HG01507       | T408M          |
| <b>No variant detected in the remaining 582 trios</b> |                |               |                |               |                |

**Supplementary Table 7: Cost of ONT analysis of the *GBA* gene per sample (in GBP\_**

| ONT as performed        |             | Multiplexing at<br>12x96 | Flongle     |
|-------------------------|-------------|--------------------------|-------------|
| Longamp polymerase*     | 4.7         |                          |             |
| AmpureXP magnetic beads | 1.0         |                          |             |
| flow-cell               | 7.7         | 0.7                      | 0.8         |
| SQK-LSK109              | 0.9         |                          |             |
| Barcoding kit           | 1.5         | 2                        |             |
| NEBNext companion       | 0.4         |                          |             |
| Electrophoresis         | 1-2         |                          |             |
| Qubit analysis          | 1-2         |                          |             |
| Other consumables**     | 1           |                          |             |
| <b>Total***</b>         | <b>18.2</b> | <b>11.7</b>              | <b>11.3</b> |

\*This is the cost per sample for 4 PCR reactions: primer pairs 1-3, and the barcoding PCR for primer pair 1 product. If one of the other PCRs also yields a product, indicating reciprocal recombination, this will also require barcoding and sequencing at additional cost for this sample.

\*\*Estimate of costs for nuclease free water, filtered tips, ethanol, agarose electrophoresis, etc.

\*\*\*This is an estimate at the time of writing (March 2022) and UK list prices, based on using one full MinION flow-cell for 94 samples (plus 2 controls). Assuming 90% of reads are on target, to reach a coverage of 550x for 94 samples requires 512Mb. The theoretical maximum flow cell yield as per Nanopore website is 50Gb. This suggests that costs could be lowered by further optimising the pipeline, for example higher level barcoding by additionally using the ONT kit SQK-PBK004, or using Flongle flow cells (maximum output 2.8 Gb). Finally, re-using MinION flow-cells after flushing is possible. We do not expect the small amount of DNA carried over to confound analysis, but we have not verified this.

**Supplementary Table 8:** *GBA/GBAPI* differentiating sites. Coordinates are in hg38.

| <b>chr</b>       | <b><i>GBA</i> position<br/>(chr1)</b> | <b><i>GBA</i> base</b> | <b><i>GBAPI</i><br/>position</b> | <b><i>GBA</i><br/><i>PI</i><br/>base</b> |
|------------------|---------------------------------------|------------------------|----------------------------------|------------------------------------------|
| <b>chr<br/>1</b> | 155231496                             | c                      | 155210868                        | g                                        |
| <b>chr<br/>1</b> | 155231522                             | a                      | 155210894                        | g                                        |
| <b>chr<br/>1</b> | 155231557                             | t                      | 155210929                        | c                                        |
| <b>chr<br/>1</b> | 155231692                             | g                      | 155211064                        | a                                        |
| <b>chr<br/>1</b> | 155231693                             | c                      | 155211065                        | t                                        |
| <b>chr<br/>1</b> | 155231701                             | t                      | 155211073                        | c                                        |
| <b>chr<br/>1</b> | 155231818                             | aca                    | 155211190                        | a                                        |
| <b>chr<br/>1</b> | 155231834                             | g                      | 155211204                        | a                                        |
| <b>chr<br/>1</b> | 155231848                             | a                      | 155211218                        | c                                        |
| <b>chr<br/>1</b> | 155231857                             | t                      | 155211227                        | c                                        |
| <b>chr<br/>1</b> | 155231870                             | a                      | 155211240                        | g                                        |
| <b>chr<br/>1</b> | 155231923                             | t                      | 155211295                        | a                                        |
| <b>chr<br/>1</b> | 155231936                             | a                      | 155211308                        | g                                        |
| <b>chr<br/>1</b> | 155231937                             | g                      | 155211309                        | a                                        |
| <b>chr<br/>1</b> | 155231941                             | a                      | 155211313                        | g                                        |
| <b>chr<br/>1</b> | 155231942                             | g                      | 155211314                        | a                                        |
| <b>chr<br/>1</b> | 155231989                             | g                      | 155211363                        | a                                        |
| <b>chr<br/>1</b> | 155232135                             | t                      | 155211509                        | a                                        |
| <b>chr<br/>1</b> | 155232231                             | g                      | 155211605                        | a                                        |
| <b>chr<br/>1</b> | 155232340                             | c                      | 155211714                        | t                                        |
| <b>chr<br/>1</b> | 155232418                             | a                      | 155211792                        | g                                        |
| <b>chr<br/>1</b> | 155232440                             | t                      | 155211814                        | c                                        |
| <b>chr<br/>1</b> | 155232447                             | a                      | 155211821                        | g                                        |
| <b>chr<br/>1</b> | 155232451                             | a                      | 155211825                        | g                                        |
| <b>chr<br/>1</b> | 155232540                             | g                      | 155211914                        | c                                        |
| <b>chr<br/>1</b> | 155232549                             | c                      | 155211923                        | g                                        |

|       |           |   |           |   |
|-------|-----------|---|-----------|---|
| chr 1 | 155232550 | g | 155211924 | a |
| chr 1 | 155232572 | t | 155211946 | c |
| chr 1 | 155232721 | c | 155212095 | t |
| chr 1 | 155232724 | c | 155212098 | t |
| chr 1 | 155232784 | a | 155212158 | g |
| chr 1 | 155232834 | a | 155212208 | c |
| chr 1 | 155232892 | g | 155212266 | t |
| chr 1 | 155232893 | a | 155212267 | t |
| chr 1 | 155232916 | g | 155212290 | c |
| chr 1 | 155232919 | a | 155212293 | g |
| chr 1 | 155232927 | g | 155212301 | a |
| chr 1 | 155232935 | a | 155212309 | g |
| chr 1 | 155232982 | g | 155212356 | a |
| chr 1 | 155233046 | a | 155212420 | g |
| chr 1 | 155233268 | c | 155212642 | g |
| chr 1 | 155233287 | g | 155212661 | a |
| chr 1 | 155233514 | a | 155212888 | g |
| chr 1 | 155233517 | c | 155212891 | t |
| chr 1 | 155233521 | t | 155212895 | a |
| chr 1 | 155233531 | g | 155212905 | a |
| chr 1 | 155233612 | a | 155212985 | g |
| chr 1 | 155233639 | g | 155213012 | a |
| chr 1 | 155234903 | c | 155214276 | t |
| chr 1 | 155235203 | c | 155214576 | g |
| chr 1 | 155235217 | c | 155214590 | g |
| chr 1 | 155235252 | a | 155214625 | g |
| chr 1 | 155235379 | a | 155214752 | g |
| chr 1 | 155235412 | g | 155214785 | a |

|       |           |                                                               |           |   |
|-------|-----------|---------------------------------------------------------------|-----------|---|
| chr 1 | 155235727 | c                                                             | 155215100 | g |
| chr 1 | 155235749 | GGGACTGTTCGACAAAGTTACGCACCCAATTGGGTCCT<br>CCTTCGGGGTTCAGGGCAA | 155215122 | g |
| chr 1 | 155235918 | a                                                             | 155215236 | g |
| chr 1 | 155236097 | g                                                             | 155215415 | c |
| chr 1 | 155236102 | t                                                             | 155215420 | c |
| chr 1 | 155236129 | t                                                             | 155215447 | c |
| chr 1 | 155236145 | g                                                             | 155215463 | c |
| chr 1 | 155236175 | g                                                             | 155215493 | a |
| chr 1 | 155236190 | a                                                             | 155215508 | g |
| chr 1 | 155237982 | t                                                             | 155216705 | c |
| chr 1 | 155237989 | g                                                             | 155216712 | a |
| chr 1 | 155237990 | c                                                             | 155216713 | t |
| chr 1 | 155237996 | g                                                             | 155216719 | t |
| chr 1 | 155237997 | c                                                             | 155216720 | t |
| chr 1 | 155238055 | t                                                             | 155216778 | c |
| chr 1 | 155238088 | t                                                             | 155216811 | c |
| chr 1 | 155238092 | t                                                             | 155216815 | g |
| chr 1 | 155238141 | a                                                             | 155216864 | t |
| chr 1 | 155238174 | c                                                             | 155216897 | t |
| chr 1 | 155238192 | a                                                             | 155216915 | g |
| chr 1 | 155238206 | a                                                             | 155216929 | c |
| chr 1 | 155238214 | a                                                             | 155216937 | c |
| chr 1 | 155238630 | g                                                             | 155217353 | a |
| chr 1 | 155238754 | g                                                             | 155217477 | a |
| chr 1 | 155238872 | ag                                                            | 155217595 | t |
| chr 1 | 155238882 | a                                                             | 155217604 | g |
| chr 1 | 155238929 | a                                                             | 155217651 | t |
| chr 1 | 155238930 | g                                                             | 155217652 | t |

**Supplementary Table 9:** *GBA* variants targeted by Gauchian. Coordinates are in hg38.

| chr  | position  | ref                                                          | alt | variant_name       |
|------|-----------|--------------------------------------------------------------|-----|--------------------|
| chr1 | 155235002 | C                                                            | T   | p.R535H            |
| chr1 | 155235003 | G                                                            | A   | p.R535C            |
| chr1 | 155235007 | C                                                            | T   | p.W533X            |
| chr1 | 155235057 | C                                                            | T   | p.G517S            |
| chr1 | 155235101 | C                                                            | T   | c.1506-1G>A        |
| chr1 | 155235196 | G                                                            | A   | p.R502C            |
| chr1 | 155235197 | G                                                            | C   | p.N501K            |
| chr1 | 155235205 | C                                                            | G   | p.V499L            |
| chr1 | 155235217 | C                                                            | G   | p.A495P            |
| chr1 | 155235241 | C                                                            | T   | p.A487T            |
| chr1 | 155235252 | A                                                            | C   | p.L483R            |
| chr1 | 155235252 | A                                                            | G   | p.L483P            |
| chr1 | 155235303 | A                                                            | C   | p.I466S            |
| chr1 | 155235679 | A                                                            | G   | c.1388+2T>C        |
| chr1 | 155235708 | G                                                            | C   | p.P454R            |
| chr1 | 155235712 | G                                                            | A   | p.Q453X            |
| chr1 | 155235721 | A                                                            | T   | p.F450I            |
| chr1 | 155235726 | T                                                            | A   | p.D448V            |
| chr1 | 155235727 | C                                                            | G   | p.D448H            |
| chr1 | 155235749 | GGGACTGTCGACAAAGTTACGCACCCAAT<br>TGGGTCCTCCTTCGGGGTTCAGGGCAA | G   | p.L422fs/c.1263del |
| chr1 | 155235750 | G                                                            | A   | p.P440L            |
| chr1 | 155235757 | C                                                            | T   | p.D438N            |
| chr1 | 155235760 | C                                                            | A   | p.V437F            |
| chr1 | 155235772 | C                                                            | A   | p.V433L            |
| chr1 | 155235780 | G                                                            | A   | p.P430L            |
| chr1 | 155235790 | C                                                            | A   | p.E427X            |
| chr1 | 155235798 | A                                                            | G   | p.L424P            |
| chr1 | 155235810 | C                                                            | T   | p.W420X            |
| chr1 | 155235819 | C                                                            | T   | p.W417X            |
| chr1 | 155235823 | C                                                            | T   | p.G416S            |
| chr1 | 155235829 | C                                                            | A   | p.V414L            |
| chr1 | 155235831 | T                                                            | G   | p.H413P            |
| chr1 | 155235841 | G                                                            | C   | p.L410V            |

|      |           |    |   |                 |
|------|-----------|----|---|-----------------|
| chr1 | 155235843 | T  | C | p.N409S         |
| chr1 | 155235843 | T  | G | p.N409T         |
| chr1 | 155236255 | C  | G | p.S405T         |
| chr1 | 155236261 | C  | G | p.S403T         |
| chr1 | 155236277 | G  | A | p.R398X         |
| chr1 | 155236285 | G  | A | p.S395F         |
| chr1 | 155236292 | G  | C | p.L393V         |
| chr1 | 155236295 | G  | A | p.R392W         |
| chr1 | 155236295 | G  | C | p.R392G         |
| chr1 | 155236298 | C  | G | p.V391L         |
| chr1 | 155236318 | G  | A | p.S384F         |
| chr1 | 155236328 | A  | C | p.C381G         |
| chr1 | 155236379 | C  | T | p.G364R         |
| chr1 | 155236384 | G  | A | p.T362I         |
| chr1 | 155236416 | C  | A | p.W351C         |
| chr1 | 155236417 | C  | G | p.W351S         |
| chr1 | 155236420 | T  | C | p.H350R         |
| chr1 | 155236426 | G  | A | p.A348V         |
| chr1 | 155236439 | CA | C | p.K342_Y343insX |
| chr1 | 155237099 | G  | T | c.999+242C>A    |
| chr1 | 155237357 | G  | A | p.P328L         |
| chr1 | 155237370 | G  | A | p.R324C         |
| chr1 | 155237394 | G  | A | p.R316C         |
| chr1 | 155237411 | C  | T | p.S310N         |
| chr1 | 155237412 | T  | C | p.S310G         |
| chr1 | 155237425 | AG | A | p.P305fs        |
| chr1 | 155237427 | G  | C | p.P305A         |
| chr1 | 155237444 | A  | G | p.I299T         |
| chr1 | 155237446 | G  | T | p.F298L         |
| chr1 | 155237453 | C  | T | p.R296Q         |
| chr1 | 155237454 | G  | A | p.R296X         |
| chr1 | 155237470 | G  | T | p.F290L         |
| chr1 | 155237474 | C  | G | p.G289A         |
| chr1 | 155237480 | C  | A | p.C287F         |



|      |           |     |    |            |
|------|-----------|-----|----|------------|
| chr1 | 155237576 | A   | T  | p.F255Y    |
| chr1 | 155237577 | A   | C  | p.F255V    |
| chr1 | 155237579 | C   | G  | c.762-1G>C |
| chr1 | 155238141 | A   | T  | p.F252I    |
| chr1 | 155238174 | C   | T  | p.G241R    |
| chr1 | 155238186 | T   | C  | p.K237E    |
| chr1 | 155238192 | A   | G  | p.S235P    |
| chr1 | 155238194 | C   | T  | p.G234E    |
| chr1 | 155238214 | A   | C  | p.N227K    |
| chr1 | 155238214 | AT  | CC | p.N227R    |
| chr1 | 155238215 | T   | C  | p.N227S    |
| chr1 | 155238228 | A   | G  | p.W223R    |
| chr1 | 155238234 | G   | T  | p.P221T    |
| chr1 | 155238242 | C   | T  | p.W218X    |
| chr1 | 155238264 | CG  | C  | p.V211fs   |
| chr1 | 155238270 | G   | A  | p.R209C    |
| chr1 | 155238298 | CAG | C  | p.L199fs   |
| chr1 | 155238519 | T   | G  | p.K196Q    |
| chr1 | 155238525 | T   | A  | p.K194X    |
| chr1 | 155238547 | GA  | G  | p.F186fs   |
| chr1 | 155238571 | AG  | A  | p.P178fs   |
| chr1 | 155238579 | C   | T  | p.D176N    |
| chr1 | 155238584 | T   | C  | p.Y174C    |
| chr1 | 155238596 | C   | A  | p.R170L    |
| chr1 | 155238596 | C   | T  | p.R170H    |
| chr1 | 155238597 | G   | A  | p.R170C    |
| chr1 | 155238608 | T   | A  | p.D166V    |
| chr1 | 155238617 | GC  | G  | p.A163fs   |
| chr1 | 155238624 | G   | A  | p.P161S    |
| chr1 | 155238629 | C   | T  | p.R159Q    |
| chr1 | 155238630 | G   | A  | p.R159W    |
| chr1 | 155239639 | A   | C  | p.L144R    |
| chr1 | 155239655 | C   | G  | p.A139P    |
| chr1 | 155239665 | CAG | C  | p.L135fs   |

|                               |           |      |    |                 |
|-------------------------------|-----------|------|----|-----------------|
| chr1                          | 155239716 | C    | G  | p.K118N         |
| chr1                          | 155239736 | G    | A  | p.Q112X         |
| chr1                          | 155239934 | G    | A  | p.R87W          |
| chr1                          | 155239939 | C    | T  | p.G85E          |
| chr1                          | 155239968 | GGTA | G  | p.T75del        |
| chr1                          | 155239989 | C    | CG | p.T69fs         |
| chr1                          | 155240033 | C    | A  | p.V54L          |
| chr1                          | 155240629 | C    | T  | c.115+1G>A      |
| chr1                          | 155240637 | C    | T  | p.W36X          |
| chr1                          | 155240651 | G    | GC | p.Q32fs         |
| chr1                          | 155240660 | G    | GC | p.L29fs         |
| chr1                          | 155240671 | AG   | A  | p.L25fs         |
| p.L483P + p.A495P + p.Val499= |           |      |    | RecNciI         |
| RecNciI + p.D448H             |           |      |    | Rec.TL          |
| RecNciI + p.D448H + c.1263del |           |      |    | c.1263del+RecTL |

**Supplementary Table 10:** PCR conditions for primer pair 1.

| Reagents                            | Volume   | °C                                                     | Time  | cycles |
|-------------------------------------|----------|--------------------------------------------------------|-------|--------|
| Template DNA (200ng)                | x µL     | 94                                                     | 30sec | 1      |
| Nuclease free water                 | 19µL - x | 94                                                     | 15sec | 35     |
| Mg2+                                | 2µL      | 65                                                     | 15sec |        |
| Forward primer                      | 2µL      | 65                                                     | 6min  |        |
| Reverse primer                      | 2µL      | 65                                                     | 10min | 1      |
| LongAmp Taq 2x polymerase mix (NEB) | 25µL     | 4                                                      | hold  |        |
| Primer pair A*                      | Forward  | 5'- TTTCTGTTGGTGCTGATATTGCTCCTAAAGTTGTCACCCATACATG -3' |       |        |
|                                     | Reverse  | 5'- ACTTGCCTGTCGCTCTATCTTCCCAACCTTTCTTCTTCTTCTCAA -3'  |       |        |

\*primers have been edited to contain the ONT barcode adapter sequence.

**Supplementary Table 11: PCR conditions for primers pairs 2 and 3.**

| Reagents                            | Volume     | °C                                                   | Time  | cycles |
|-------------------------------------|------------|------------------------------------------------------|-------|--------|
| Template DNA (100ng)                | x µL       | 95                                                   | 3min  | 1      |
| Nuclease free water                 | 24.5µL - x | 95                                                   | 15sec | 12     |
|                                     |            | 62                                                   | 15sec |        |
|                                     |            | 65                                                   | 10min |        |
| Barcode mix                         | 0.5µL      | 65                                                   | 10min | 1      |
| LongAmp Taq 2x polymerase mix (NEB) | 25µL       | 4                                                    | hold  |        |
| Primer pair B*                      | Forward    | 5'-TTTCTGTTGGTGCTGATATTGCATGTGTCCATTCTCCATGTCTTCA-3' |       |        |
|                                     | Reverse    | 5'-ACTTGCCTGTCGCTCTATCTTCAGCCTTCCTTCCTCCCTGCAT-3'    |       |        |
| Primer pair C*                      | Forward    | 5'-TTTCTGTTGGTGCTGATATTGCGTGTCCGTTCTCCACATCCTTG-3'   |       |        |
|                                     | Reverse    | 5'-ACTTGCCTGTCGCTCTATCTTCCCAACCTTTCTTCCTTCTTCAA-3'   |       |        |

\*primers have been edited to contain the ONT barcode adapter sequence.
